# Supplementary material for: Comparing the durability of the long-lasting insecticidal nets DawaPlus® 2.0 and DuraNet© in northwest Democratic Republic of Congo
Source: Springer Nature journal article supplement (doi:10.1186/s12936-020-03262-0), 2020-05-24
Supplement: MOESM2 [file 18009218]

## Additional file 2

### Household characteristics

Table: Household characteristics (based on households that were seen at baseline and endline surveys)

| Variable                               | Sud Ubangi       | Mongala          | P-value<br>for comparison<br>between sites |
|----------------------------------------|------------------|------------------|--------------------------------------------|
|                                        | % (95% CI)*      | % (95% CI)*      |                                            |
| <b>Demographic</b>                     |                  |                  |                                            |
| Mean number of de-jure members         | 7.3 (6.7-7.9)    | 6.2 (5.8-6.6)    | 0.005                                      |
| Mean age of head of household in years | 44.5 (40.5-48.2) | 43.3 (37.8-49.0) | 0.75                                       |
| Proportion of female headed households | 11.3 ( 4.6-25.1) | 7.4 ( 4.2-12.7)  | 0.40                                       |
| Proportion of under-fives              | 21.8 (19.2-24.7) | 16.5 (13.1-20.7) | 0.037                                      |
| Education of male heads of household   |                  |                  |                                            |
| Non-literate                           | 29.2 (19.5-41.1) | 15.4 ( 8.1-27.3) | 0.10                                       |
| Primary                                | 16.7 (11.6-23.3) | 25.3 (18.2-34.0) |                                            |
| Secondary                              | 54.2 (41.5-66.3) | 59.3 (45.7-71.6) |                                            |
| <b>House characteristics</b>           |                  |                  |                                            |
| Improved roof materials                | 14.9 ( 4.5-39.7) | 21.0 ( 8.3-43.7) | 0.61                                       |
| Improved wall materials                | 5.4 ( 0.8-28.4)  | 18.5 ( 5.9-45.2) | 0.20                                       |
| Improved floor materials               | 1.2 ( 0.2- 4.8)  | 13.0 ( 3.8-35.6) | 0.003                                      |
| Cooking fuel kerosene or gas           | 0.0 (-.-)        | 0.0 (-.-)        | n.a.                                       |
| <b>Water and sanitation</b>            |                  |                  |                                            |
| Access to safe water                   | 0.0 (-.-)        | 18.5 ( 5.5-47.3) | 0.070                                      |
| Access to any latrine                  | 98.2 (95.2-99.4) | 99.4 (95.5-99.9) | 0.32                                       |
| Improved latrine or flush toilet       | 0.0 (-.-)        | 0.0 (-.-)        | n.a.                                       |
| <b>Household assets</b>                |                  |                  |                                            |
| Any transport                          | 47.2 (34.6-59.8) | 55.6 (42.3-68.1) | 0.35                                       |
| Type of transport                      |                  |                  |                                            |
| Bicycle                                | 44.1 (32.3-56.5) | 48.2 (34.8-61.7) | 0.65                                       |
| Motorcycle                             | 9.5 ( 3.9-21.6)  | 16.7 ( 9.6-27.4) | 0.25                                       |
| Car                                    | 0.0 (-.-)        | 0.0 (-.-)        | n.a.                                       |
| Owns farm land                         | 70.8 (49.7-85.7) | 64.8 (49.6-77.5) | 0.61                                       |
| Owns livestock                         | 91.7 (83.6-96.0) | 79.6 (73.9-84.4) | 0.015                                      |
| Type of livestock                      |                  |                  |                                            |
| Chicken                                | 79.3 (69.6-86.5) | 69.9 (61.2-77.5) | 0.12                                       |
| Goats                                  | 27.4 (19.5-37.1) | 17.9 (11.5-26.7) | 0.11                                       |
| Cows                                   | 1.2 ( 0.1- 9.2)  | 0.0 (-.-)        | 0.35                                       |
| Household items owned                  |                  |                  |                                            |
| Radio                                  | 42.3 (29.9-55.7) | 53.7 (42.6-64.4) | 0.19                                       |
| Television                             | 0.6 ( 0.1- 4.9)  | 7.4 ( 3.2-15.7)  | 0.007                                      |
| Refrigerator                           | 0.0 (-.-)        | 0.0 (-.-)        | n.a.                                       |
| Fan                                    | 0.0 (-.-)        | 0.0 (-.-)        | n.a.                                       |
| Iron                                   | 0.0 (-.-)        | 0.0 (-.-)        | n.a.                                       |
| Any mobile phone                       | 7.7 ( 3.4-16.8)  | 22.2 (12.6-36.2) | 0.03                                       |
| Smartphone or computer                 | 1.2 ( 0.3- 4.5)  | 0.0 (-.-)        | 0.14                                       |
